# Supplementary material for: Molecular delimitation of European leafy liverworts of the genus Calypogeia based on plastid super-barcodes
Source: PubMed Central journal article supplement (PMC7257191; doi:10.1186/s12870-020-02435-y), 2020-05-28

**Figure S1.** Phylograms based on amino acids and complete plastid genomes of *Calypogeia* species. The posterior probability value lower than 1 is given at the node.

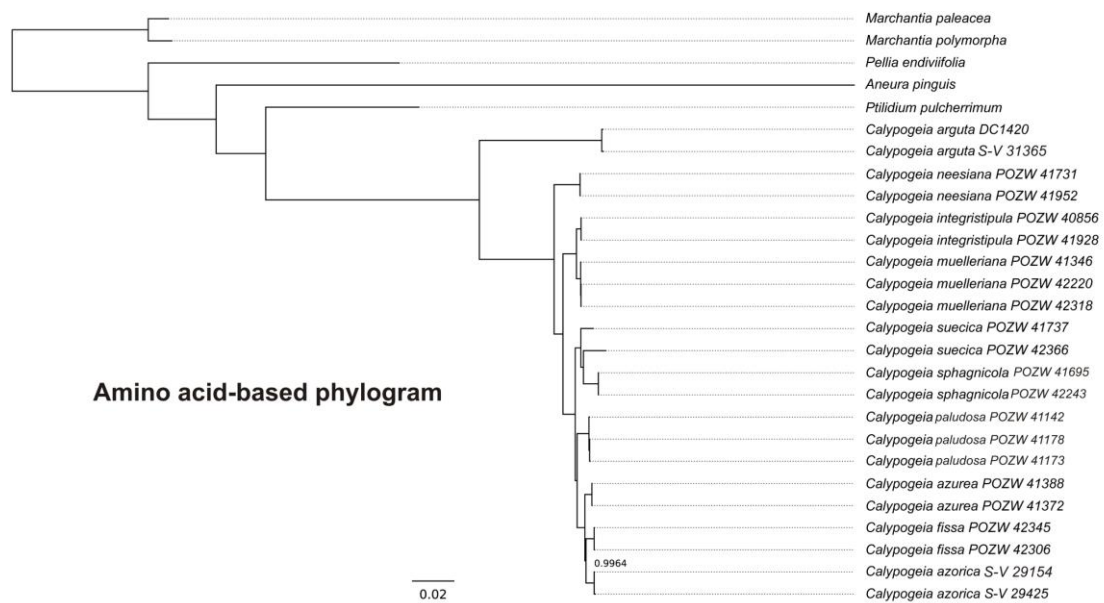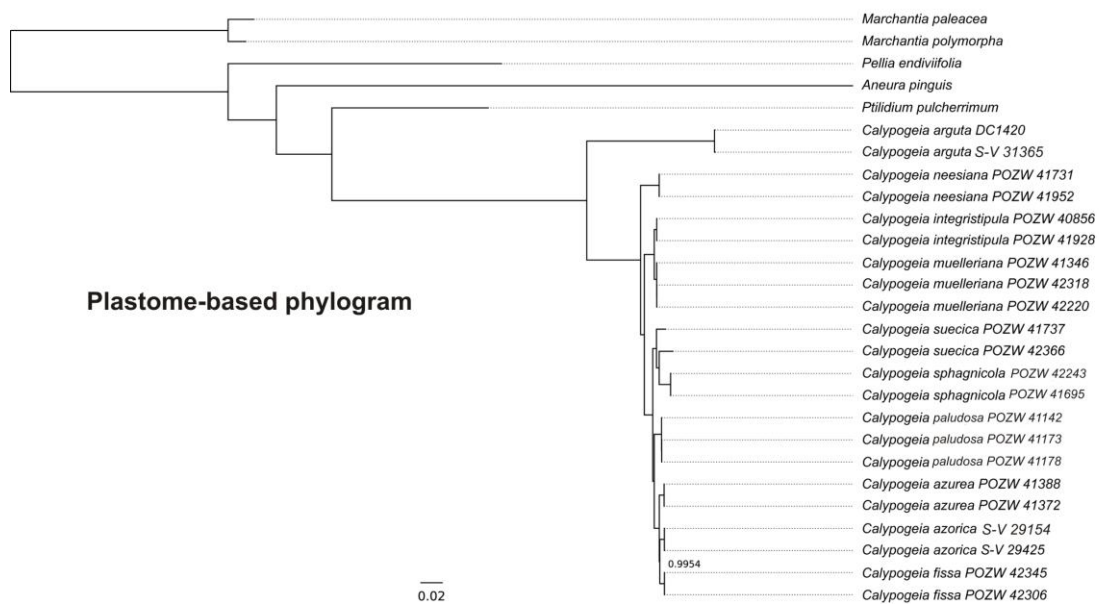

Supplement: 12870_2020_2435_MOESM6_ESM.pdf [file 12870_2020_2435_MOESM6_ESM.pdf]
